# Supplementary material
Source: publisher figshare collection journal article supplement (https://sage.figshare.com/ndownloader/files/21672465)
Supplement: Supplementary file 1 [file 21672465]

### ***Research Highlights***

- Use of  $\text{Al}_2\text{O}_3$  nanoparticles in refrigerant (R134a) improves the COP of refrigeration system
- The refrigerant temperature drop across the condenser increases (3.0% to 23.77%), resulting in sub-cooling of nano-refrigerant before leaving the condenser
- The temperature gain across the evaporator is enhanced (4.69% to 39.30%)
- The performance of the system drops down when the dispersion concentration is increased to 1% from 0.5%.
- The heat transfer coefficient is found to be improving for condenser
